# Supplementary material for: Profiling of mRNA of interstitial fibrosis and tubular atrophy with subclinical inflammation in recipients after kidney transplantation
Source: Aging (Albany NY). 2019 Jul 25;11(14):5215–31. doi: 10.18632/aging.102115 (PMC6682514; doi:10.18632/aging.102115)
Supplement: Supplementary Tables [file aging-11-102115-s002.pdf]

## Supplementary Tables

**Supplementary Table 1. Demographic and clinical characteristics of the biopsies for clinical indications according to histologic analysis in GSE22459.**

| Characteristic                                                                         | Normal    | IFTA             | IFTA-I             | P                   |
|----------------------------------------------------------------------------------------|-----------|------------------|--------------------|---------------------|
| <i>n</i> %                                                                             | 57        | 30               | 13                 | NS                  |
| <b>T12 surveillance biopsy scores, original report (mean ± SD)</b>                     |           |                  |                    |                     |
| <b>g</b>                                                                               | 0.0 ± 0.0 | 0.0 ± 0.0        | 0.3 ± 0.6          | NS, 0.002, 0.002    |
| <b>i</b>                                                                               | 0.0 ± 0.0 | 0.0 ± 0.0        | 1.4 ± 0.6          | NS, 0.0001, 0.0001  |
| <b>t</b>                                                                               | 0.0 ± 0.0 | 0.0 ± 0.0        | 1.3 ± 1.0          | NS, 0.0001, 0.0001  |
| <b>ci</b>                                                                              | 0.0 ± 0.0 | 1.2 ± 0.5        | 1.2 ± 0.5          | 0.0001, 0.0001, 0.9 |
| <b>ct</b>                                                                              | 0.0 ± 0.0 | 1.2 ± 0.5        | 1.2 ± 0.7          | 0.0001, 0.0001, 0.7 |
| <b>cv</b>                                                                              | 0.3 ± 0.5 | 0.8 ± 0.7        | 0.5 ± 0.8          | 0.0001, 0.4, 0.1    |
| <b>ah</b>                                                                              | 0.1 ± 0.3 | 0.3 ± 0.5        | 0.5 ± 0.8          | 0.001, 0.1, 0.9     |
| <b>T12 surveillance biopsy scores, blinded reread (mean ± SD [% with score &gt;1])</b> |           |                  |                    |                     |
| <b>total i</b>                                                                         | ND        | 0.07 ± 0.26 (6%) | 1.81 ± 0.93 (100%) | —, —, 0.0001        |
| <b>Age at Tx (years, mean ± SD)</b>                                                    |           |                  |                    |                     |
| <b>Recipient</b>                                                                       | 52 ± 12   | 51 ± 15          | 47 ± 17            | 0.5                 |
| <b>Donor</b>                                                                           | 40 ± 11   | 44 ± 12          | 46 ± 14            | 0.1                 |
| <b>Female gender (%)</b>                                                               |           |                  |                    |                     |
| <b>Recipient</b>                                                                       | 45        | 36               | 55                 | 0.3                 |
| <b>Donor</b>                                                                           | 55        | 47               | 55                 | 0.7                 |
| <b>GFRu/2 (C<sub>ioth</sub> ml/min; mean ± SD)</b>                                     | 59 ± 11   | 60 ± 12          | 55 ± 11            | 0.2                 |

**Supplementary Table 2. Demographic and clinical characteristics of the biopsies for clinical indications according to histologic analysis in GSE9489.**

| Characteristic                                    | STA          | IFTA          | P     |
|---------------------------------------------------|--------------|---------------|-------|
| No. biopsies                                      | 7            | 22            | NS    |
| No. patients                                      | 7            | 22            | NS    |
| Recipient age (years)                             | 43.1 ± 8.7   | 46.9 ± 12.2   | NS    |
| Recipient gender ( <i>n</i> , % male)             | 6 (86%)      | 15 (68.2%)    | NS    |
| Donor age (years)                                 | 45.2 ± 15.4  | 43.4 ± 17.1   | NS    |
| No. HLA mismatches                                | 1.8 ± 1.5    | 2.9 ± 1.3     | NS    |
| No. historic AR episodes (% patients with ≥1)     | 14.3         | 36.4          | NS    |
| Time of biopsy (months post-Tx)                   | 25.1 ± 51.4  | 83.2 ± 64.8   | 0.042 |
| No. patients with CNI toxicity (histology)        | 1            | 3             | NS    |
| No. patients on a CNI-free regimen                | 0            | 2             | NS    |
| Serum creatinine (lmol/l)                         | 160.0 ± 44.4 | 281.6 ± 204.6 | NS    |
| GFR MDRD-calculated (ml/min/1.73 m <sup>2</sup> ) | 43.0 ± 15.5  | 27.6 ± 13.5   | 0.017 |

**Supplementary Table 3. Demographic and clinical characteristics of the biopsies for clinical indications according to histologic analysis in GSE76882.**

| Characteristics                                       | IFTA           | IFTA-I         | Tx             | P       |
|-------------------------------------------------------|----------------|----------------|----------------|---------|
| Donors                                                |                |                |                |         |
| Age (mean $\pm$ SE)                                   | 40 $\pm$ 2     | 41 $\pm$ 5     | 41 $\pm$ 2     | 0.8     |
| Female                                                | 23 (58%)       | 5 (50%)        | 37 (47%)       | 0.61    |
| Black                                                 | 5 (13%)        | 0              | 4 (5%)         | 0.39    |
| Recipients                                            |                |                |                |         |
| Total number of patients                              | 40             | 10             | 82             | N/A     |
| Total number of biopsies                              | 42             | 10             | 99             | N/A     |
| IFTA Grade (Banff) 1/2/3                              | 18/16/6        | 4/4/0          | N/A            | 0.67    |
| Protocol biopsy                                       | 13/40 (33%)    | 3/10 (30%)     | 72/82 (88%)    | <0.0001 |
| Age (mean $\pm$ SE)                                   | 44 $\pm$ 2     | 49 $\pm$ 5     | 50 $\pm$ 2     | 0.02    |
| Female                                                | 19 (48%)       | 3 (30%)        | 28 (34%)       | 0.55    |
| African American                                      | 4 (10%)        | 1 (10%)        | 6 (7%)         | 0.64    |
| Diabetes                                              | 4 (11%)        | 2 (20%)        | 11 (13%)       | 0.91    |
| Deceased donor                                        | 24 (62%)       | 7 (78%)        | 43 (52%)       | 0.57    |
| HLA mm (mean $\pm$ SE)                                | 3.3 $\pm$ 0.3  | 3.7 $\pm$ 0.7  | 3.6 $\pm$ 0.2  | 0.54    |
| PRA $\geq$ 20                                         | 8 (22%)        | 1 (13%)        | 11 (13%)       | 0.77    |
| Induction therapy                                     | 34 (85%)       | 10 (100%)      | 62 (76%)       | 0.24    |
| C4d positive                                          | 2 (5%)         | 1 (10%)        | 1 (1%)         | <0.0001 |
| Borderline or suspicious for acute cellular rejection | 14 (33%)       | 6 (60%)        | 2 (2%)         | <0.0001 |
| Time to biopsy (median days; interquartile range)     | 1105; 377–2875 | 489; 231–1692  | 376; 362–425   | <0.0001 |
| Biopsy >12 months                                     | 34 (85%)       | 6 (60%)        | 60 (73%)       | <0.0001 |
| Death-censored graft loss                             | 14 (35%)       | 3 (30%)        | 0              | N/A     |
| Time to death-censored graft loss                     | 2935 $\pm$ 346 | 1708 $\pm$ 747 | N.A.           | 0.015   |
| Time from biopsy to graft loss                        | 452 $\pm$ 189  | 412 $\pm$ 408  | N.A.           | 0.78    |
| Death                                                 | 6 (15%)        | 1 (10%)        | 3 (4%)         | N/A     |
| Time to death                                         | 1813 $\pm$ 385 | 1324 $\pm$ 944 | 1549 $\pm$ 408 | 0.87    |

**Supplementary Table 4. Demographic and clinical characteristics of the biopsies for clinical indications according to histologic analysis in GSE9492.**

| Characteristic        | STA  | IFTA              |
|-----------------------|------|-------------------|
| No. biopsies          | 1    | 3                 |
| No. patients          | 1    | 3                 |
| Recipient age (years) | Lost | 44.33 $\pm$ 11.37 |

**Supplementary Table 5. Demographic and clinical characteristics of the biopsies for clinical indications according to histologic analysis in GSE213714.**

| Patient demographics                             | All patients   | Failed grafts | Non-failed grafts | <i>P</i>        |
|--------------------------------------------------|----------------|---------------|-------------------|-----------------|
| n                                                | <i>n</i> = 105 | <i>n</i> = 30 | <i>n</i> = 75     |                 |
| Time of follow-up after biopsy (d)               | 774            | 404           | 922               | $3 \times 10^6$ |
| Time of biopsy after transplant (d)              | 1734           | 1,853         | 1,688             | 0.64            |
| Recipient sex, M/F                               | 65/40          | 20/10         | 45/30             | 0.82            |
| Race                                             |                |               |                   |                 |
| White                                            | 64 (61%)       | 18 (60%)      | 46 (61%)          | 0.99            |
| Black                                            | 10 (10%)       | 4 (13%)       | 6 (8%)            | 0.7             |
| Other                                            | 15 (14%)       | 4 (13%)       | 11 (15%)          | 0.98            |
| Unknown                                          | 16 (15%)       | 4 (13%)       | 12 (16%)          | 0.98            |
| Primary disease                                  |                |               |                   |                 |
| Diabetic nephropathy                             | 13 (12%)       | 4 (13%)       | 9 (12%)           | 0.98            |
| Hypertension/large-vessel disease                | 6 (6%)         | 1 (3%)        | 5 (7%)            | 0.8             |
| Glomerulonephritis/vasculitis                    | 51 (49%)       | 20 (67%)      | 31 (41%)          | 0.06            |
| Interstitial nephritis/pyelonephritis            | 8 (8%)         | 1 (3%)        | 7 (9%)            | 0.58            |
| Polycystic kidney disease                        | 14 (13%)       | 1 (3%)        | 13 (17%)          | 0.16            |
| Others                                           | 7 (7%)         | 2 (7%)        | 5 (7%)            | 1               |
| Unknown etiology                                 | 6 (6%)         | 1 (3%)        | 5 (7%)            | 0.8             |
| Previous transplant                              | 9 (9%)         | 0 (0%)        | 9 (12%)           | 0.14            |
| Donor sex, M/F                                   | 41/64          | 9/21          | 32/43             | 0.49            |
| Deceased donor transplants                       | 57 (54%)       | 18 (60%)      | 39 (52%)          | 0.76            |
| Indication for biopsy                            |                |               |                   |                 |
| Rapid deterioration of graft function            | 26 (25%)       | 14 (47%)      | 12 (16%)          | 0.004           |
| Slow deterioration of graft function             | 39 (37%)       | 7 (23%)       | 32 (43%)          | 0.18            |
| Stable impaired graft function                   | 7 (7%)         | 1 (3%)        | 6 (8%)            | 0.69            |
| Investigate proteinuria                          | 15 (14%)       | 7 (23%)       | 8 (11%)           | 0.25            |
| Follow-up from previous biopsy                   | 6 (6%)         | 1 (3%)        | 5 (7%)            | 0.8             |
| Others                                           | 6 (6%)         | 0 (0%)        | 6 (8%)            | 0.28            |
| Indication unknown                               | 6 (6%)         | 0 (0%)        | 6 (8%)            | 0.28            |
| Estimated GFR (average ml/min $\pm$ SD)          | 47 $\pm$ 18    | 38 $\pm$ 20   | 50 $\pm$ 17       | 0.002           |
| Proteinuria-positive                             | 57 (54%)       | 25 (83%)      | 32 (43%)          | <0.001          |
| HLA antibody status PRA-positive                 | 64 (61%)       | 21 (70%)      | 43 (57%)          | 0.49            |
| Polycystic kidney disease                        | 14 (13%)       | 1 (3%)        | 13 (17%)          | 0.16            |
| PRA class I-positive                             | 44 (42%)       | 12 (40%)      | 32 (43%)          | 0.97            |
| PRA class II-positive                            | 48 (46%)       | 16 (53%)      | 32 (43%)          | 0.61            |
| DSA-positive                                     | 48 (46%)       | 18 (60%)      | 30 (40%)          | 0.18            |
| DSA class I-positive                             | 18 (17%)       | 7 (23%)       | 11 (15%)          | 0.57            |
| DSA class II-positive                            | 38 (36%)       | 15 (50%)      | 25 (33%)          | 0.28            |
| Maintenance immunosuppressive regimens at biopsy |                |               |                   |                 |
| MMF, tacrolimus, steroid                         | 37 (35%)       | 11 (37%)      | 26 (35%)          | 0.98            |
| MMF, tacrolimus                                  | 1 (1%)         | 1 (3%)        | 0 (0%)            | 0.28            |
| MMF, cyclosporine, steroid                       | 26 (25%)       | 7 (23%)       | 19 (25%)          | 0.98            |
| MMF, steroids                                    | 3 (3%)         | 0 (0%)        | 3 (4%)            | 0.54            |
| Azathioprine, cyclosporine, steroids             | 20 (19%)       | 5 (17%)       | 15 (20%)          | 0.93            |
| Others                                           | 18 (17%)       | 6 (20%)       | 12 (16%)          | 0.89            |

<sup>1</sup>Some data were missing

Please browse Full Text version to see the data of Supplementary Table 6:

**Supplementary Table 6. Genetic and biological functions of the key genes.**
